# Supplementary material
Source: PubMed Central journal article supplement (PMC3591658)
Supplement: supp_M112.023135_mcp.M112.023135-2.pdf [file supp_M112.023135_mcp.M112.023135-2.pdf]

**Table 1.** Sequences used in this study

| S. No | Uniprot ID | Scientific Name               | Common Name                | SVMP Type   |
|-------|------------|-------------------------------|----------------------------|-------------|
| 1     | A7X4D4     | <i>Psammophis mossambicus</i> | Olive Sand Snake           | Monodomain  |
| 2     | A7X4B5     | <i>Psammophis mossambicus</i> | Olive Sand Snake           | Monodomain  |
| 3     | A7X4E9     | <i>Psammophis mossambicus</i> | Olive Sand Snake           | Monodomain  |
| 4     | A7X4C4     | <i>Psammophis mossambicus</i> | Olive Sand Snake           | Monodomain  |
| 5     | A7X4C0     | <i>Psammophis mossambicus</i> | Olive Sand Snake           | Monodomain  |
| 6     | A7X4C9     | <i>Psammophis mossambicus</i> | Olive Sand Snake           | Monodomain  |
| 7     | A7X437     | <i>Psammophis mossambicus</i> | Olive Sand Snake           | Monodomain  |
| 8     | A7X447     | <i>Psammophis mossambicus</i> | Olive Sand Snake           | Monodomain  |
| 9     | A7X443     | <i>Psammophis mossambicus</i> | Olive Sand Snake           | Monodomain  |
| 10    | A7X497     | <i>Psammophis mossambicus</i> | Olive Sand Snake           | Monodomain  |
| 11    | A7X4A6     | <i>Psammophis mossambicus</i> | Olive Sand Snake           | Monodomain  |
| 12    | A7X493     | <i>Psammophis mossambicus</i> | Olive Sand Snake           | Monodomain  |
| 13    | A7X452     | <i>Psammophis mossambicus</i> | Olive Sand Snake           | Monodomain  |
| 14    | A7X457     | <i>Psammophis mossambicus</i> | Olive Sand Snake           | Monodomain  |
| 15    | A7X4B0     | <i>Psammophis mossambicus</i> | Olive Sand Snake           | Monodomain  |
| 16    | A7X484     | <i>Psammophis mossambicus</i> | Olive Sand Snake           | Monodomain  |
| 17    | A7X476     | <i>Psammophis mossambicus</i> | Olive Sand Snake           | Monodomain  |
| 18    | A7X480     | <i>Psammophis mossambicus</i> | Olive Sand Snake           | Monodomain  |
| 19    | A7X488     | <i>Psammophis mossambicus</i> | Olive Sand Snake           | Monodomain  |
| 20    | A7X468     | <i>Psammophis mossambicus</i> | Olive Sand Snake           | Monodomain  |
| 21    | A7X473     | <i>Psammophis mossambicus</i> | Olive Sand Snake           | Monodomain  |
| 22    | A7X461     | <i>Psammophis mossambicus</i> | Olive Sand Snake           | Monodomain  |
| 23    | A7X465     | <i>Psammophis mossambicus</i> | Olive Sand Snake           | Monodomain  |
|       |            |                               |                            |             |
| 1     | E9JGG6     | <i>Echis coloratus</i>        | Carpet Viper               | Monodomain  |
| 2     | Q3BER2     | <i>Echis ocellatus</i>        | Ocellated Saw-scaled Viper | Monodomain  |
| 3     | E9JGH5     | <i>Echis carinatus</i>        | Saw-scaled Viper           | Monodomain  |
| 4     | E9JGH6     | <i>Echis carinatus</i>        | Saw-scaled Viper           | Monodomain  |
| 5     | Q3BER3     | <i>Echis ocellatus</i>        | Ocellated Saw-scaled Viper | Monodomain  |
|       |            |                               |                            |             |
| 1     | E9JG65     | <i>Echis coloratus</i>        | Ocellated Saw-scaled Viper | Multidomain |
| 2     | E9JG60     | <i>Echis coloratus</i>        | Ocellated Saw-scaled Viper | Multidomain |
| 3     | E9JG72     | <i>Echis coloratus</i>        | Ocellated Saw-scaled Viper | Multidomain |
| 4     | E9JG56     | <i>Echis coloratus</i>        | Ocellated Saw-scaled Viper | Multidomain |
| 5     | E9JG82     | <i>Echis coloratus</i>        | Ocellated Saw-scaled Viper | Multidomain |
| 6     | E9JG75     | <i>Echis coloratus</i>        | Ocellated Saw-scaled Viper | Multidomain |
| 7     | E9JG74     | <i>Echis coloratus</i>        | Ocellated Saw-scaled Viper | Multidomain |
| 8     | E9JG76     | <i>Echis coloratus</i>        | Ocellated Saw-scaled Viper | Multidomain |
| 9     | E9JG70     | <i>Echis coloratus</i>        | Ocellated Saw-scaled Viper | Multidomain |
| 10    | E9JG80     | <i>Echis coloratus</i>        | Ocellated Saw-scaled Viper | Multidomain |
| 11    | E9JG68     | <i>Echis coloratus</i>        | Ocellated Saw-scaled Viper | Multidomain |
| 12    | E9JG59     | <i>Echis coloratus</i>        | Ocellated Saw-scaled Viper | Multidomain |
| 13    | E9JG69     | <i>Echis coloratus</i>        | Ocellated Saw-scaled Viper | Multidomain |
| 14    | E9JG64     | <i>Echis coloratus</i>        | Ocellated Saw-scaled Viper | Multidomain |
| 15    | E9JG61     | <i>Echis coloratus</i>        | Ocellated Saw-scaled Viper | Multidomain |
| 16    | E9JG85     | <i>Echis coloratus</i>        | Ocellated Saw-scaled Viper | Multidomain |
| 17    | E9JG57     | <i>Echis coloratus</i>        | Ocellated Saw-scaled Viper | Multidomain |
| 18    | E9JGA0     | <i>Echis coloratus</i>        | Ocellated Saw-scaled Viper | Multidomain |
| 19    | E9JG88     | <i>Echis coloratus</i>        | Ocellated Saw-scaled Viper | Multidomain |
| 20    | E9JG62     | <i>Echis coloratus</i>        | Ocellated Saw-scaled Viper | Multidomain |
| 21    | E9JGA7     | <i>Echis coloratus</i>        | Ocellated Saw-scaled Viper | Multidomain |
| 22    | E9JG89     | <i>Echis coloratus</i>        | Ocellated Saw-scaled Viper | Multidomain |
| 23    | E9JG73     | <i>Echis coloratus</i>        | Ocellated Saw-scaled Viper | Multidomain |
| 24    | E9JG71     | <i>Echis coloratus</i>        | Ocellated Saw-scaled Viper | Multidomain |
| 25    | E9JG67     | <i>Echis coloratus</i>        | Ocellated Saw-scaled Viper | Multidomain |
