# Supplementary material
Source: PubMed Central journal article supplement (PMC3591658)
Supplement: supp_M112.023135_mcp.M112.023135-3.pdf [file supp_M112.023135_mcp.M112.023135-3.pdf]

**Table 1.** Selection Analyses: *Psammophis mossambicus* monodomain Snake venom metalloproteinase (SVMP) propeptide

| Model                                     | Likelihood (l) | $\omega_0^a$ | Parameters                                                                                                                                                                             | Sign. <sup>b</sup> | No. of Sites with $\omega > 1^c$        |
|-------------------------------------------|----------------|--------------|----------------------------------------------------------------------------------------------------------------------------------------------------------------------------------------|--------------------|-----------------------------------------|
| <b>M0 (One ratio)</b>                     | -894.467732    | 0.94         | = $\omega_0$                                                                                                                                                                           |                    | -                                       |
| <b>M1 (Neutral)</b>                       | -888.786682    | 0.71         | P <sub>0</sub> : 0.313<br>$\omega_0$ : 0.08<br>P <sub>1</sub> : 0.686<br>$\omega_1$ : 1.0                                                                                              |                    | -                                       |
| <b>M2 (Selection)*</b>                    | -883.578432    | 1.24         | P <sub>0</sub> : 0.238<br>$\omega_0$ : 0.05<br>P <sub>1</sub> : 0.677<br>$\omega_1$ : 1.0<br>P <sub>2</sub> : 0.08<br>$\omega_2$ : 6.56<br>P <sub>0</sub> : 0.357<br>$\omega_0$ : 0.17 | P < 0.01           | 0 (PP $\geq$ 0.99)<br>1 (P $\geq$ 0.95) |
| <b>M3 (Discrete)*</b>                     | -883.453150    | 1.32         | P <sub>1</sub> : 0.567<br>$\omega_1$ : 1.26<br>P <sub>2</sub> : 0.075<br>$\omega_2$ : 7.19                                                                                             | P << 0.001         | -                                       |
| <b>M7 (beta)</b>                          | -888.908593    | 0.72         | p: 0.04035<br>q: 0.01444<br>p <sub>0</sub> : 0.914<br>p: 0.045                                                                                                                         |                    | -                                       |
| <b>M8 (beta and <math>\omega</math>)*</b> | -883.629400    | 1.23         | q: 0.01<br>p <sub>1</sub> : 0.0853<br>$\omega$ : 6.46                                                                                                                                  | P < 0.01           | 0 (PP $\geq$ 0.99)<br>2 (P > 0.95)      |

**Legend:**

**a:** dn/ds (weighted average)

**b:** Significance of the model in comparison with the null model

**c:** Number of sites with  $\omega > 1$  under the Bayes empirical Bayes approach with a posterior probability (PP) more than or equal to 0.99 and 0.95

\* Models which allow  $\omega > 1$

**Table 2.** Selection Analyses: *Echis* monodomain Snake venom metalloproteinase (SVMP) propeptide

| Model                                     | Likelihood ( $\iota$ ) | $\omega_0^a$ | Parameters                                                                                                                                                                          | Sign. <sup>b</sup>      | No. of Sites with $\omega > 1^c$        |
|-------------------------------------------|------------------------|--------------|-------------------------------------------------------------------------------------------------------------------------------------------------------------------------------------|-------------------------|-----------------------------------------|
|                                           |                        |              |                                                                                                                                                                                     |                         | <b>B.E.B</b>                            |
| <b>M0 (One ratio)</b>                     | -777.728563            | 0.39         | = $\omega_0$                                                                                                                                                                        |                         | -                                       |
| <b>M1 (Neutral)</b>                       | -776.461469            | 0.34         | P <sub>0</sub> : 0.650<br>$\omega_0$ : 0.0<br>P <sub>1</sub> : 0.349<br>$\omega_1$ : 1.0                                                                                            |                         | -                                       |
| <b>M2 (Selection)*</b>                    | -775.740783            | 0.52         | P <sub>0</sub> : 0.845<br>$\omega_0$ : 0.0<br>P <sub>1</sub> : 0.0<br>$\omega_1$ : 1.0<br>P <sub>2</sub> : 0.154<br>$\omega_2$ : 3.37<br>P <sub>0</sub> : 0.523<br>$\omega_0$ : 0.0 | P > 0.05 <sup>N.S</sup> | 0 (PP $\geq$ 0.99)<br>0 (P $\geq$ 0.95) |
| <b>M3 (Discrete)*</b>                     | -775.740783            | 0.52         | P <sub>1</sub> : 0.322<br>$\omega_1$ : 0.0<br>P <sub>2</sub> : 0.154<br>$\omega_2$ : 3.37                                                                                           | P > 0.05 <sup>N.S</sup> | -                                       |
| <b>M7 (beta)</b>                          | -776.514054            | 0.40         | p: 0.00500<br>q: 0.00758<br>p <sub>0</sub> : 0.845<br>p: 0.005                                                                                                                      |                         | -                                       |
| <b>M8 (beta and <math>\omega</math>)*</b> | -775.740783            | 0.52         | q: 1.60<br>p <sub>1</sub> : 0.154<br>$\omega$ : 3.37                                                                                                                                | P > 0.05 <sup>N.S</sup> | 0 (PP $\geq$ 0.99)<br>0 (P > 0.95)      |

**Legend:****a:** dn/ds (weighted average)**b:** Significance of the model in comparison with the null model**c:** Number of sites with  $\omega > 1$  under the Bayes empirical Bayes approach with a posterior probability (PP) more than or equal to 0.99 and 0.95\* Models which allow  $\omega > 1$ 

N. S: Not significant

**Table 3.** Selection Analyses: *Echis coloratus* multidomain Snake venom metalloproteinase (SVMP) propeptide

| Model                    | Likelihood (l) | $\omega_0^a$ | Parameters                                                                                                                                                                             | Sign. <sup>b</sup>      | No. of Sites with $\omega > 1^c$        |
|--------------------------|----------------|--------------|----------------------------------------------------------------------------------------------------------------------------------------------------------------------------------------|-------------------------|-----------------------------------------|
| M0 (One ratio)           | -1584.752493   | 0.39         | = $\omega_0$                                                                                                                                                                           |                         | -                                       |
| M1 (Neutral)             | -1571.361292   | 0.43         | P <sub>0</sub> : 0.592<br>$\omega_0$ : 0.03<br>P <sub>1</sub> : 0.407<br>$\omega_1$ : 1.0                                                                                              |                         | -                                       |
| M2 (Selection)*          | -1570.667617   | 0.46         | P <sub>0</sub> : 0.603<br>$\omega_0$ : 0.05<br>P <sub>1</sub> : 0.377<br>$\omega_1$ : 1.0<br>P <sub>2</sub> : 0.018<br>$\omega_2$ : 3.11<br>P <sub>0</sub> : 0.493<br>$\omega_0$ : 0.0 | P > 0.05 <sup>N.S</sup> | 0 (PP $\geq$ 0.99)<br>0 (P $\geq$ 0.95) |
| M3 (Discrete)*           | -1570.560349   | 0.45         | P <sub>1</sub> : 0.462<br>$\omega_1$ : 0.74<br>P <sub>2</sub> : 0.043<br>$\omega_2$ : 2.56                                                                                             | P << 0.001              | -                                       |
| M7 (beta)                | -1570.973255   | 0.43         | p: 0.02691<br>q: 0.03429<br>p <sub>0</sub> : 0.972<br>p: 0.119                                                                                                                         |                         | -                                       |
| M8 (beta and $\omega$ )* | -1570.607852   | 0.46         | q: 0.184<br>p: 0.027<br>$\omega$ : 2.84                                                                                                                                                | P > 0.05 <sup>N.S</sup> | 0 (PP $\geq$ 0.99)<br>0 (P > 0.95)      |

**Legend:**

**a:** dn/ds (weighted average)

**b:** Significance of the model in comparison with the null model

**c:** Number of sites with  $\omega > 1$  under the Bayes empirical Bayes approach with a posterior probability (PP) more than or equal to 0.99 and 0.95

\* Models which allow  $\omega > 1$

N. S: Not significant

**Table 4.** Selection Analyses: *Echis coloratus* Snake venom metalloproteinase (SVMP) Peptidase M12B

| Model                                     | Likelihood (L) | $\omega_0^a$ | Parameters                                                                                                                                                                             | Sign. <sup>b</sup> | No. of Sites with $\omega > 1^c$         | B.E.B |
|-------------------------------------------|----------------|--------------|----------------------------------------------------------------------------------------------------------------------------------------------------------------------------------------|--------------------|------------------------------------------|-------|
| <b>M0 (One ratio)</b>                     | -2897.950513   | 1.33         | = $\omega_0$                                                                                                                                                                           |                    |                                          | -     |
| <b>M1 (Neutral)</b>                       | -2900.490765   | 1.0          | P <sub>0</sub> : 1.0<br>$\omega_0$ : 1.0<br>P <sub>1</sub> : 0.0<br>$\omega_1$ : 1.0                                                                                                   |                    |                                          | -     |
| <b>M2 (Selection)*</b>                    | -2836.001209   | 1.60         | P <sub>0</sub> : 0.199<br>$\omega_0$ : 0.0<br>P <sub>1</sub> : 0.476<br>$\omega_1$ : 1.0<br>P <sub>2</sub> : 0.324<br>$\omega_2$ : 3.48<br>P <sub>0</sub> : 0.305<br>$\omega_0$ : 0.11 | P << 0.001         | 5 (PP $\geq$ 0.99)<br>10 (P $\geq$ 0.95) |       |
| <b>M3 (Discrete)*</b>                     | -2834.118633   | 1.75         | P <sub>1</sub> : 0.608<br>$\omega_1$ : 1.90<br>P <sub>2</sub> : 0.086<br>$\omega_2$ : 6.55                                                                                             | P << 0.001         |                                          | -     |
| <b>M7 (beta)</b>                          | -2862.716038   | 0.71         | p: 0.03801<br>q: 0.01372<br>p <sub>0</sub> : 0.672<br>p: 0.011                                                                                                                         |                    |                                          | -     |
| <b>M8 (beta and <math>\omega</math>)*</b> | -2836.004261   | 1.60         | q: 0.005<br>p: 0.327<br>$\omega$ : 3.47                                                                                                                                                | P << 0.001         | 14 (PP $\geq$ 0.99)<br>14 (P > 0.95)     |       |

**Legend:**

**a:** dn/ds (weighted average)

**b:** Significance of the model in comparison with the null model

**c:** Number of sites with  $\omega > 1$  under the Bayes empirical Bayes approach with a posterior probability (PP) more than or equal to 0.99 and 0.95

\* Models which allow  $\omega > 1$

**Table 5.** Selection Analyses: *Echis coloratus* Snake venom metalloproteinase (SVMP) Disintegrin

| Model                                     | Likelihood ( $\iota$ ) | $\omega_0^a$ | Parameters                                                                                                                                                                                                                                                                             | Sign. <sup>b</sup> | No. of Sites with $\omega > 1^c$        | B.E.B |
|-------------------------------------------|------------------------|--------------|----------------------------------------------------------------------------------------------------------------------------------------------------------------------------------------------------------------------------------------------------------------------------------------|--------------------|-----------------------------------------|-------|
| <b>M0 (One ratio)</b>                     | -1014.038058           | 0.92         | = $\omega_0$                                                                                                                                                                                                                                                                           |                    |                                         | -     |
| <b>M1 (Neutral)</b>                       | -992.288438            | 0.52         | <b>P<sub>0</sub></b> : 0.498<br><b><math>\omega_0</math></b> : 0.05<br><b>P<sub>1</sub></b> : 0.501<br><b><math>\omega_1</math></b> : 1.0                                                                                                                                              |                    |                                         | -     |
| <b>M2 (Selection)*</b>                    | -980.305148            | 1.35         | <b>P<sub>0</sub></b> : 0.537<br><b><math>\omega_0</math></b> : 0.16<br><b>P<sub>1</sub></b> : 0.219<br><b><math>\omega_1</math></b> : 1.0<br><b>P<sub>2</sub></b> : 0.242<br><b><math>\omega_2</math></b> : 4.30<br><b>P<sub>0</sub></b> : 0.254<br><b><math>\omega_0</math></b> : 0.0 | P << 0.001         | 3 (PP $\geq$ 0.99)<br>3 (P $\geq$ 0.95) |       |
| <b>M3 (Discrete)*</b>                     | -980.045669            | 1.32         | <b>P<sub>1</sub></b> : 0.488<br><b><math>\omega_1</math></b> : 0.53<br><b>P<sub>2</sub></b> : 0.257<br><b><math>\omega_2</math></b> : 4.15                                                                                                                                             | P << 0.001         |                                         | -     |
| <b>M7 (beta)</b>                          | -992.774365            | 0.52         | <b>p</b> : 0.02247<br><b>q</b> : 0.01935<br><b>p<sub>0</sub></b> : 0.746<br><b>p</b> : 0.559                                                                                                                                                                                           |                    |                                         | -     |
| <b>M8 (beta and <math>\omega</math>)*</b> | -980.155609            | 1.33         | <b>q</b> : 0.958<br><b>p<sub>i</sub></b> : 0.253<br><b><math>\omega</math></b> : 4.18                                                                                                                                                                                                  | P << 0.001         | 4 (PP $\geq$ 0.99)<br>5 (P > 0.95)      |       |

**Legend:****a:** dn/ds (weighted average)**b:** Significance of the model in comparison with the null model**c:** Number of sites with  $\omega > 1$  under the Bayes empirical Bayes approach with a posterior probability (PP) more than or equal to 0.99 and 0.95\* Models which allow  $\omega > 1$

**Table 6.** Selection Analyses: *Echis coloratus* Snake venom metalloproteinase (SVMP) Cysteine-rich Domain

| Model                                     | Likelihood (l) | $\omega_0^a$ | Parameters                                                                                                                                                                                                                                                                    | Sign. <sup>b</sup> | No. of Sites with $\omega > 1^c$        | B.E.B |
|-------------------------------------------|----------------|--------------|-------------------------------------------------------------------------------------------------------------------------------------------------------------------------------------------------------------------------------------------------------------------------------|--------------------|-----------------------------------------|-------|
| <b>M0 (One ratio)</b>                     | -1591.157230   | 0.97         | = $\omega_0$                                                                                                                                                                                                                                                                  |                    |                                         | -     |
| <b>M1 (Neutral)</b>                       | -1553.512752   | 0.60         | <b>P<sub>0</sub>: 0.407</b><br><b><math>\omega_0</math>: 0.02</b><br><b>P<sub>1</sub>: 0.592</b><br><b><math>\omega_1</math>: 1.0</b>                                                                                                                                         |                    |                                         | -     |
| <b>M2 (Selection)*</b>                    | -1537.293303   | 1.43         | <b>P<sub>0</sub>: 0.320</b><br><b><math>\omega_0</math>: 0.0</b><br><b>P<sub>1</sub>: 0.466</b><br><b><math>\omega_1</math>: 1.0</b><br><b>P<sub>2</sub>: 0.212</b><br><b><math>\omega_2</math>: 4.57</b><br><b>P<sub>0</sub>: 0.327</b><br><b><math>\omega_0</math>: 0.0</b> | P << 0.001         | 4 (PP $\geq$ 0.99)<br>4 (P $\geq$ 0.95) |       |
| <b>M3 (Discrete)*</b>                     | -1537.259170   | 1.49         | <b>P<sub>1</sub>: 0.471</b><br><b><math>\omega_1</math>: 1.08</b><br><b>P<sub>2</sub>: 0.201</b><br><b><math>\omega_2</math>: 4.87</b>                                                                                                                                        | P << 0.001         |                                         | -     |
| <b>M7 (beta)</b>                          | -1553.495533   | 0.61         | <b>p: 0.02894</b><br><b>q: 0.01687</b><br><b>p<sub>0</sub>: 0.788</b><br><b>p: 0.007</b>                                                                                                                                                                                      |                    |                                         | -     |
| <b>M8 (beta and <math>\omega</math>)*</b> | -1537.298493   | 1.44         | <b>q: 0.005</b><br><b>p<sub>1</sub>: 0.211</b><br><b><math>\omega</math>: 4.6</b>                                                                                                                                                                                             | P << 0.001         | 6 (PP $\geq$ 0.99)<br>9 (P > 0.95)      |       |

**Legend:**

**a:** dn/ds (weighted average)

**b:** Significance of the model in comparison with the null model

**c:** Number of sites with  $\omega > 1$  under the Bayes empirical Bayes approach with a posterior probability (PP) more than or equal to 0.99 and 0.95

\* Models which allow  $\omega > 1$

**Table 7.** Selection Analyses: *Echis coloratus* Snake venom metalloproteinase (SVMP), entire toxin

| Model                                     | Likelihood ( $\iota$ ) | $\omega_0^a$ | Parameters                                                                                                                                         | Sign. <sup>b</sup> | No. of Sites with $\omega > 1^c$          |
|-------------------------------------------|------------------------|--------------|----------------------------------------------------------------------------------------------------------------------------------------------------|--------------------|-------------------------------------------|
| <b>M0 (One ratio)</b>                     | -7582.537380           | 0.89         | = $\omega_0$                                                                                                                                       |                    | -                                         |
| <b>M1 (Neutral)</b>                       | -7417.733058           | 0.57         | $P_0$ : 0.440<br>$\omega_0$ : 0.03<br>$P_1$ : 0.559<br>$\omega_1$ : 1.0                                                                            |                    | -                                         |
| <b>M2 (Selection)*</b>                    | -7362.356460           | 1.16         | $P_0$ : 0.373<br>$\omega_0$ : 0.0<br>$P_1$ : 0.421<br>$\omega_1$ : 1.0<br>$P_2$ : 0.204<br>$\omega_2$ : 3.59<br>$P_0$ : 0.496<br>$\omega_1$ : 0.10 | P << 0.001         | 9 (PP $\geq$ 0.99)<br>18 (P $\geq$ 0.95)  |
| <b>M3 (Discrete)*</b>                     | -7361.284591           | 1.20         | $P_1$ : 0.440<br>$\omega_1$ : 1.77<br>$P_2$ : 0.063<br>$\omega_2$ : 5.88                                                                           | P << 0.001         | -                                         |
| <b>M7 (beta)</b>                          | -7418.843502           | 0.60         | $p$ : 0.02705<br>$q$ : 0.01615<br>$p_0$ : 0.788<br>$p$ : 0.026                                                                                     |                    | -                                         |
| <b>M8 (beta and <math>\omega</math>)*</b> | -7362.406809           | 1.15         | $q$ : 0.023<br>$p_1$ : 0.211<br>$\omega$ : 3.51                                                                                                    | P << 0.001         | 14 (PP $\geq$ 0.99)<br>20 (P $\geq$ 0.95) |

**Legend:****a:** dn/ds (weighted average)**b:** Significance of the model in comparison with the null model**c:** Number of sites with  $\omega > 1$  under the Bayes empirical Bayes approach with a posterior probability (PP) more than or equal to 0.99 and 0.95\* Models which allow  $\omega > 1$
